# Supplementary material for: Sediment aggradation rates in Himalayan rivers revealed through the InSAR differential residual topographic phase
Source: Copernicus journal article supplement (doi:10.5194/esurf-13-531-2025), 2025-07-08
Supplement: Supplementary file 1 [file esurf-13-531-2025-supplement.zip]

## Sheet: model ratio of 1.01
Distance (m)	H1 (mm) with same B1	H2 (mm) with same B1	H2 (mm) with 1.01B1	Elevation change H2-H1 (mm) with same B1	Elevation change H2-H1 (mm) with B2=1.01B1	two difference's ratio
140000	20	40	40.4	20	20.4	1.02
140500	19	38	38.38	19	19.38	1.02
141000	18	36	36.36	18	18.36	1.02
141500	17	34	34.34	17	17.34	1.02
142000	16	32	32.32	16	16.32	1.02
142500	15	30	30.3	15	15.3	1.02
143000	14	28	28.28	14	14.28	1.02
143500	13	26	26.26	13	13.26	1.02
144000	12	24	24.24	12	12.24	1.02
144500	11	22	22.22	11	11.22	1.02
145000	10	20	20.2	10	10.2	1.02
145500	9	18	18.18	9	9.18	1.02
146000	8	16	16.16	8	8.16	1.02
146500	7	14	14.14	7	7.14	1.02
147000	6	12	12.12	6	6.12	1.02
147500	5	10	10.1	5	5.1	1.02
148000	4	8	8.08	4	4.08	1.02
148500	3	6	6.06	3	3.06	1.02
149000	2	4	4.04	2	2.04	1.02
149500	1	2	2.02	1	1.02	1.02

## Sheet: model ratio of 0.94
Distance (m)	H1 (mm) with same B1	H2 (mm) with same B1	H2 (mm) with B2=0.94B1	Elevation change H2-H1 (mm) with same B1	Elevation change H2-H1 (mm) with B2=0.94B1	two difference's ratio
140000	20	40	37.6	20	17.6	0.88
140500	19	38	35.72	19	16.72	0.88
141000	18	36	33.84	18	15.84	0.88
141500	17	34	31.96	17	14.96	0.88
142000	16	32	30.08	16	14.08	0.88
142500	15	30	28.2	15	13.2	0.88
143000	14	28	26.32	14	12.32	0.88
143500	13	26	24.44	13	11.44	0.88
144000	12	24	22.56	12	10.56	0.88
144500	11	22	20.68	11	9.68	0.88
145000	10	20	18.8	10	8.8	0.88
145500	9	18	16.92	9	7.92	0.88
146000	8	16	15.04	8	7.04	0.88
146500	7	14	13.16	7	6.16	0.88
147000	6	12	11.28	6	5.28	0.88
147500	5	10	9.4	5	4.4	0.88
148000	4	8	7.52	4	3.52	0.88
148500	3	6	5.64	3	2.64	0.88
149000	2	4	3.76	2	1.76	0.88
149500	1	2	1.88	1	0.88	0.88

## Sheet: model ratio of 1.04
Distance (m)	H1 (mm) with same B1	H2 (mm) with same B1	H2 (mm) with B2=1.04B1	Elevation change H2-H1 (mm) with same B1	Elevation change H2-H1 (mm) with B2=1.04B1	two difference's ratio
140000	20	40	41.6	20	21.6	1.08
140500	19	38	39.52	19	20.52	1.08
141000	18	36	37.44	18	19.44	1.08
141500	17	34	35.36	17	18.36	1.08
142000	16	32	33.28	16	17.28	1.08
142500	15	30	31.2	15	16.2	1.08
143000	14	28	29.12	14	15.12	1.08
143500	13	26	27.04	13	14.04	1.08
144000	12	24	24.96	12	12.96	1.08
144500	11	22	22.88	11	11.88	1.08
145000	10	20	20.8	10	10.8	1.08
145500	9	18	18.72	9	9.72	1.08
146000	8	16	16.64	8	8.64	1.08
146500	7	14	14.56	7	7.56	1.08
147000	6	12	12.48	6	6.48	1.08
147500	5	10	10.4	5	5.4	1.08
148000	4	8	8.32	4	4.32	1.08
148500	3	6	6.24	3	3.24	1.08
149000	2	4	4.16	2	2.16	1.08
149500	1	2	2.08	1	1.08	1.08
