# Supplementary material for: Sediment aggradation rates in Himalayan rivers revealed through the InSAR differential residual topographic phase
Source: Copernicus journal article supplement (doi:10.5194/esurf-13-531-2025), 2025-07-08
Supplement: Supplementary file 1 [file esurf-13-531-2025-supplement.zip]

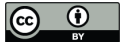

## *Supplement of*

# **Sediment aggradation rates in Himalayan rivers revealed through the In-SAR differential residual topographic phase**

**Jingqiu Huang and Hugh D. Sinclair**

*Correspondence to:* Jingqiu Huang (jq.huang@ed.ac.uk)

- esurf-13-531-2025-supplement-title-page.pdf
- Supplements
  - Esurf\_Daisy\_supplements\_2\_uncertainty forward model.xlsx
  - Esurf\_revised\_supplements\_1\_v3.pdf

The copyright of individual parts of the supplement might differ from the article licence.
